# Supplementary material
Source: PubMed Central journal article supplement (PMC8724285)
Supplement: 41422_2021_587_MOESM1_ESM.pdf [file 41422_2021_587_MOESM1_ESM.pdf]

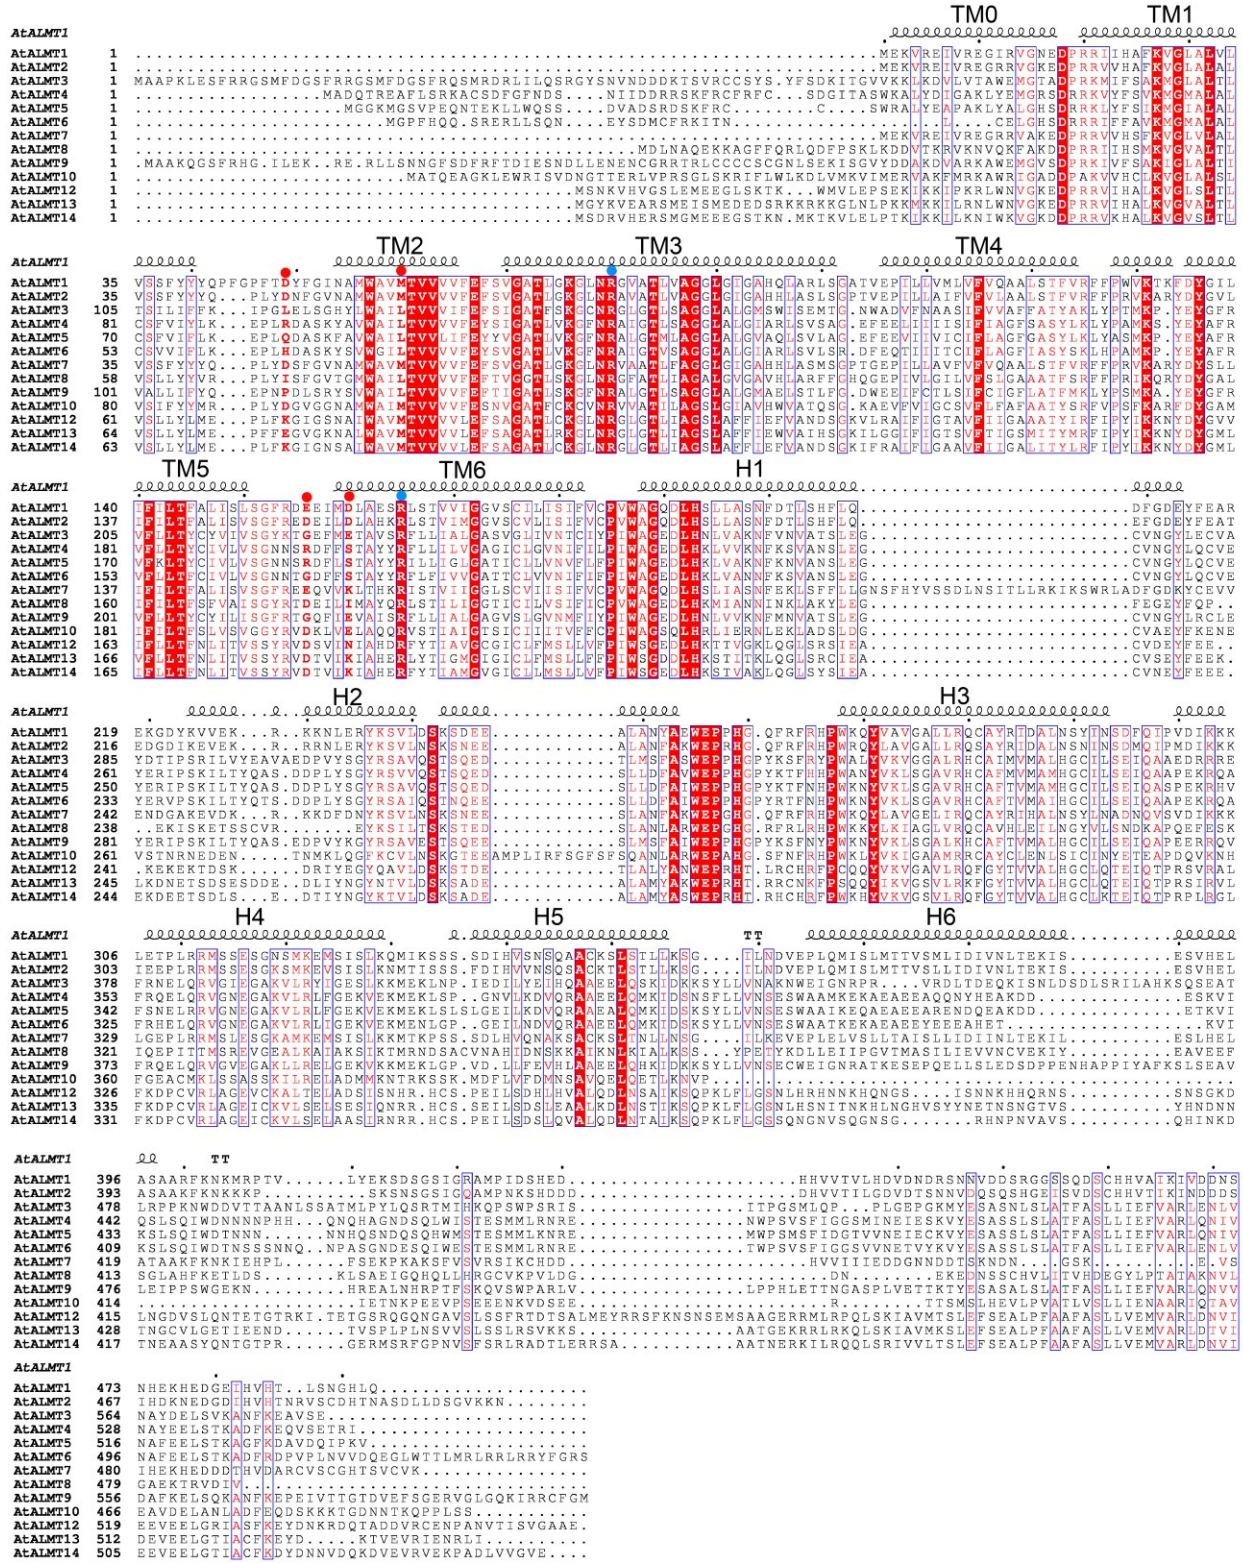

1  
 2 **Fig. S1** Sequence alignment of ALMT family members in *Arabidopsis thaliana*. AtALMT11  
 3 contains only two transmembrane helices and therefore is not aligned. Secondary structures are

- 1 assigned based on the structure of AtALMT1. Cyan dots indicate the two Arg residues involved
- 2 in the malate recognition, and red dots indicate residues participating in the Al coordination.
- 3
