# Supplementary material
Source: PubMed Central journal article supplement (PMC8724285)
Supplement: 41422_2021_587_MOESM2_ESM.pdf [file 41422_2021_587_MOESM2_ESM.pdf]

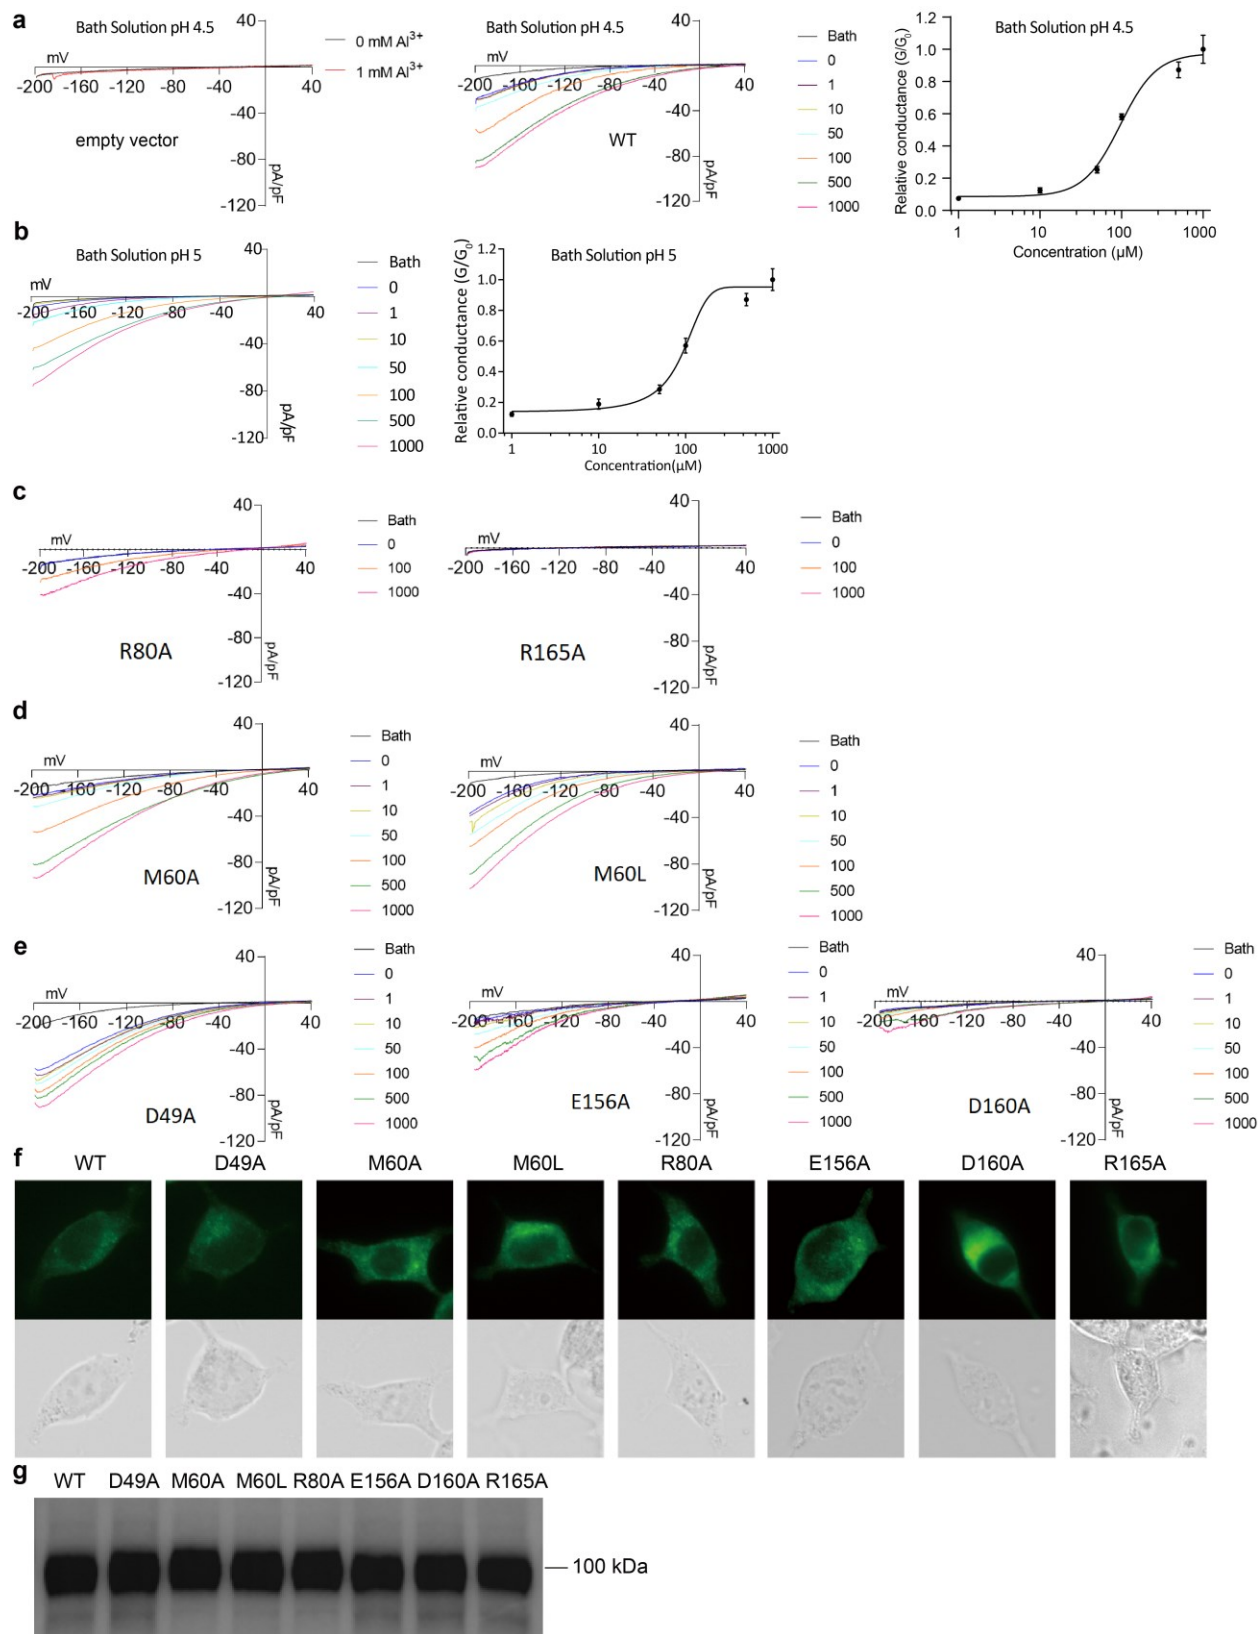

1

2 **Fig. S2 Electrophysiological analyses of AtALMT1.**

1 **a**, Representative  $I-V$  curves of empty vector (left) or AtALMT1 (middle) transfected HEK293T  
2 cells at various concentrations of extracellular  $Al^{3+}$ . The “Bath” and “0”  $I-V$  curves indicate the  
3 first and the last sweep of ramp recording model before  $Al^{3+}$  was perfused established by whole-  
4 cell configuration.  $Al^{3+}$  was perfused with different concentrations (in  $\mu M$ ) when getting the  
5 steady-state currents. The membrane potential was held at 0 mV, and a voltage ramp of 500 ms  
6 duration from  $-200$  mV to  $+80$  mV was applied every 5 s. The right panel shows the concentration-  
7 dependent extracellular  $Al^{3+}$  activation of wild-type (WT) AtALMT1. Data are reported as mean  
8  $\pm$  s.e.m. of at least five independent biological replicates. Curves are least-square fits to a Hill  
9 equation with half-maximum activation concentration ( $EC_{50}$ ) values of  $98.17 \pm 3.53 \mu M$ . **b**, The  
10 same current recording as that in **a** except that the bath solution pH was changed to 5.  $EC_{50} = 120.7$   
11  $\pm 11.93 \mu M$ . **c-e**, Representative  $I-V$  curves of mutant AtALMT1-transfected HEK293T cells at  
12 various concentrations of extracellular  $Al^{3+}$ . **f**, Representative fluorescent (upper) and bright field  
13 (lower) images of cells expressing green fluorescent protein (GFP)-strep-tagged WT and mutant  
14 AtALMT1. GFP fluorescence was readily detected in WT and mutant AtALMT1 cells with similar  
15 patterns. **g**, Western Blots with anti-strep antibody to probe the membrane extract of HEK293 cells  
16 overexpressing GFP-strep-tagged WT and mutant AtALMT1 shows that the WT and mutant  
17 AtALMT1 display comparable expression levels on the membrane.

18
