# Supplementary material
Source: PubMed Central journal article supplement (PMC8724285)
Supplement: 41422_2021_587_MOESM3_ESM.pdf [file 41422_2021_587_MOESM3_ESM.pdf]

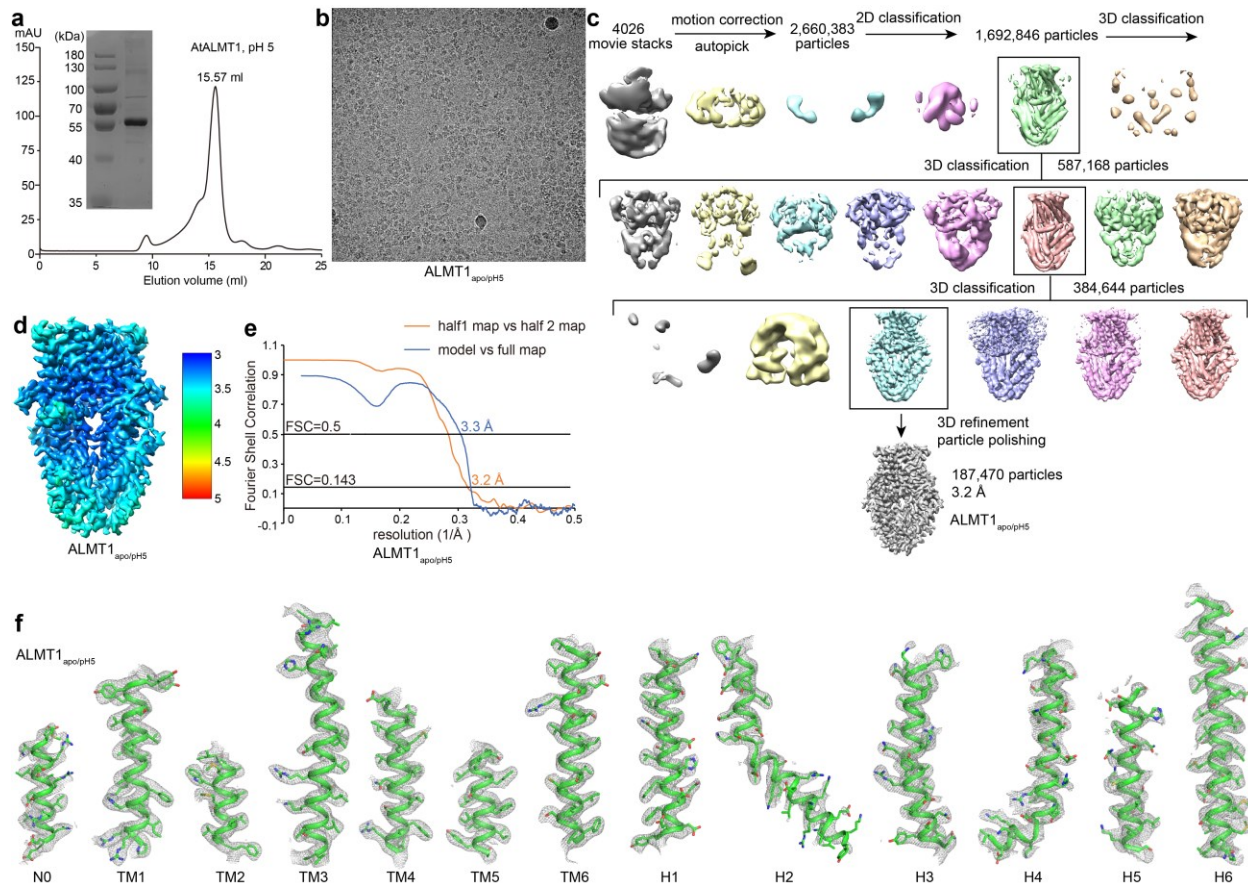

1

2 **Fig. S3 Structure determination of ALMT1<sub>apo/pH5</sub>.**

3 **a**, Size-exclusion chromatography of the apo AtALMT1 at pH 5 on Superose 6 (GE Healthcare),  
 4 and SDS-PAGE image of the final protein sample. **b**, Representative cryo-EM micrograph of  
 5 ALMT1<sub>apo/pH5</sub>. **c**, Flowchart of image processing for ALMT1<sub>apo/pH5</sub> particles. **d**, The density map  
 6 of ALMT1<sub>apo/pH5</sub> colored by local resolution in Å. **e**, The Gold standard Fourier Shell Correlation  
 7 (FSC) curve of the final 3D reconstruction of ALMT1<sub>apo/pH5</sub>, and the FSC curve for cross-  
 8 validation between the map and the model of ALMT1<sub>apo/pH5</sub>. **f**, Sample maps at the 13 helices from  
 9 ALMT1<sub>apo/pH5</sub> at the contour level of 4σ.

10
