# Supplementary material
Source: PubMed Central journal article supplement (PMC8724285)
Supplement: 41422_2021_587_MOESM4_ESM.pdf [file 41422_2021_587_MOESM4_ESM.pdf]

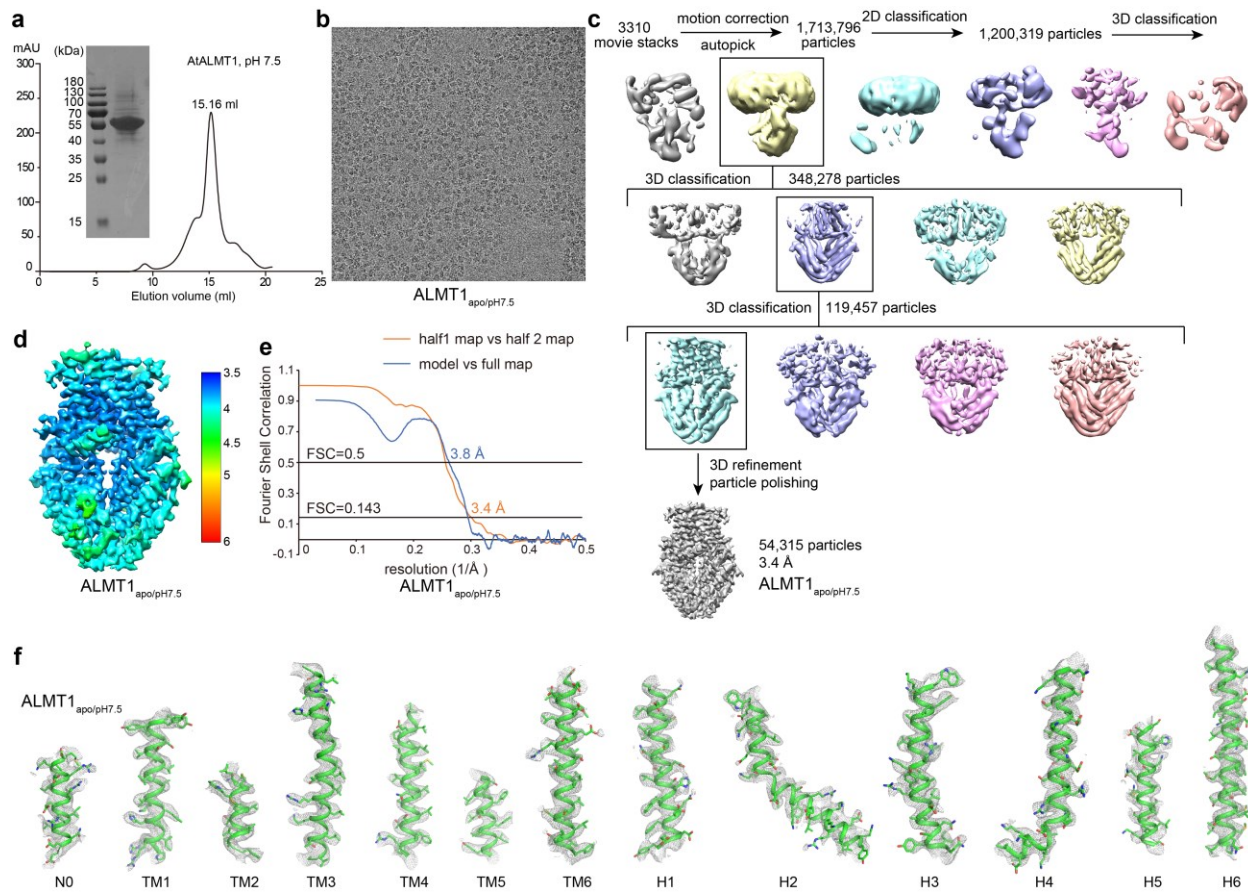

**Fig. S4 Structure determination of ALMT1<sub>apo/pH7.5</sub>.**

**a**, Size-exclusion chromatography of the apo AtALMT1 at pH 7.5 on Superose 6 (GE Healthcare), and SDS-PAGE image of the final protein sample. **b**, Representative cryo-EM micrograph of ALMT1<sub>apo/pH7.5</sub>. **c**, Flowchart of image processing for ALMT1<sub>apo/pH7.5</sub> particles. **d**, The density map of ALMT1<sub>apo/pH7.5</sub> colored by local resolution in Å. **e**, The Gold standard Fourier Shell Correlation (FSC) curve of the final 3D reconstruction of ALMT1<sub>apo/pH7.5</sub>, and the FSC curve for cross-validation between the map and the model of ALMT1<sub>apo/pH7.5</sub>. **f**, Sample maps at the 13 helices from ALMT1<sub>apo/pH7.5</sub> at the contour level of 4  $\sigma$ .

10
