# Supplementary material
Source: PubMed Central journal article supplement (PMC8724285)
Supplement: 41422_2021_587_MOESM5_ESM.pdf [file 41422_2021_587_MOESM5_ESM.pdf]

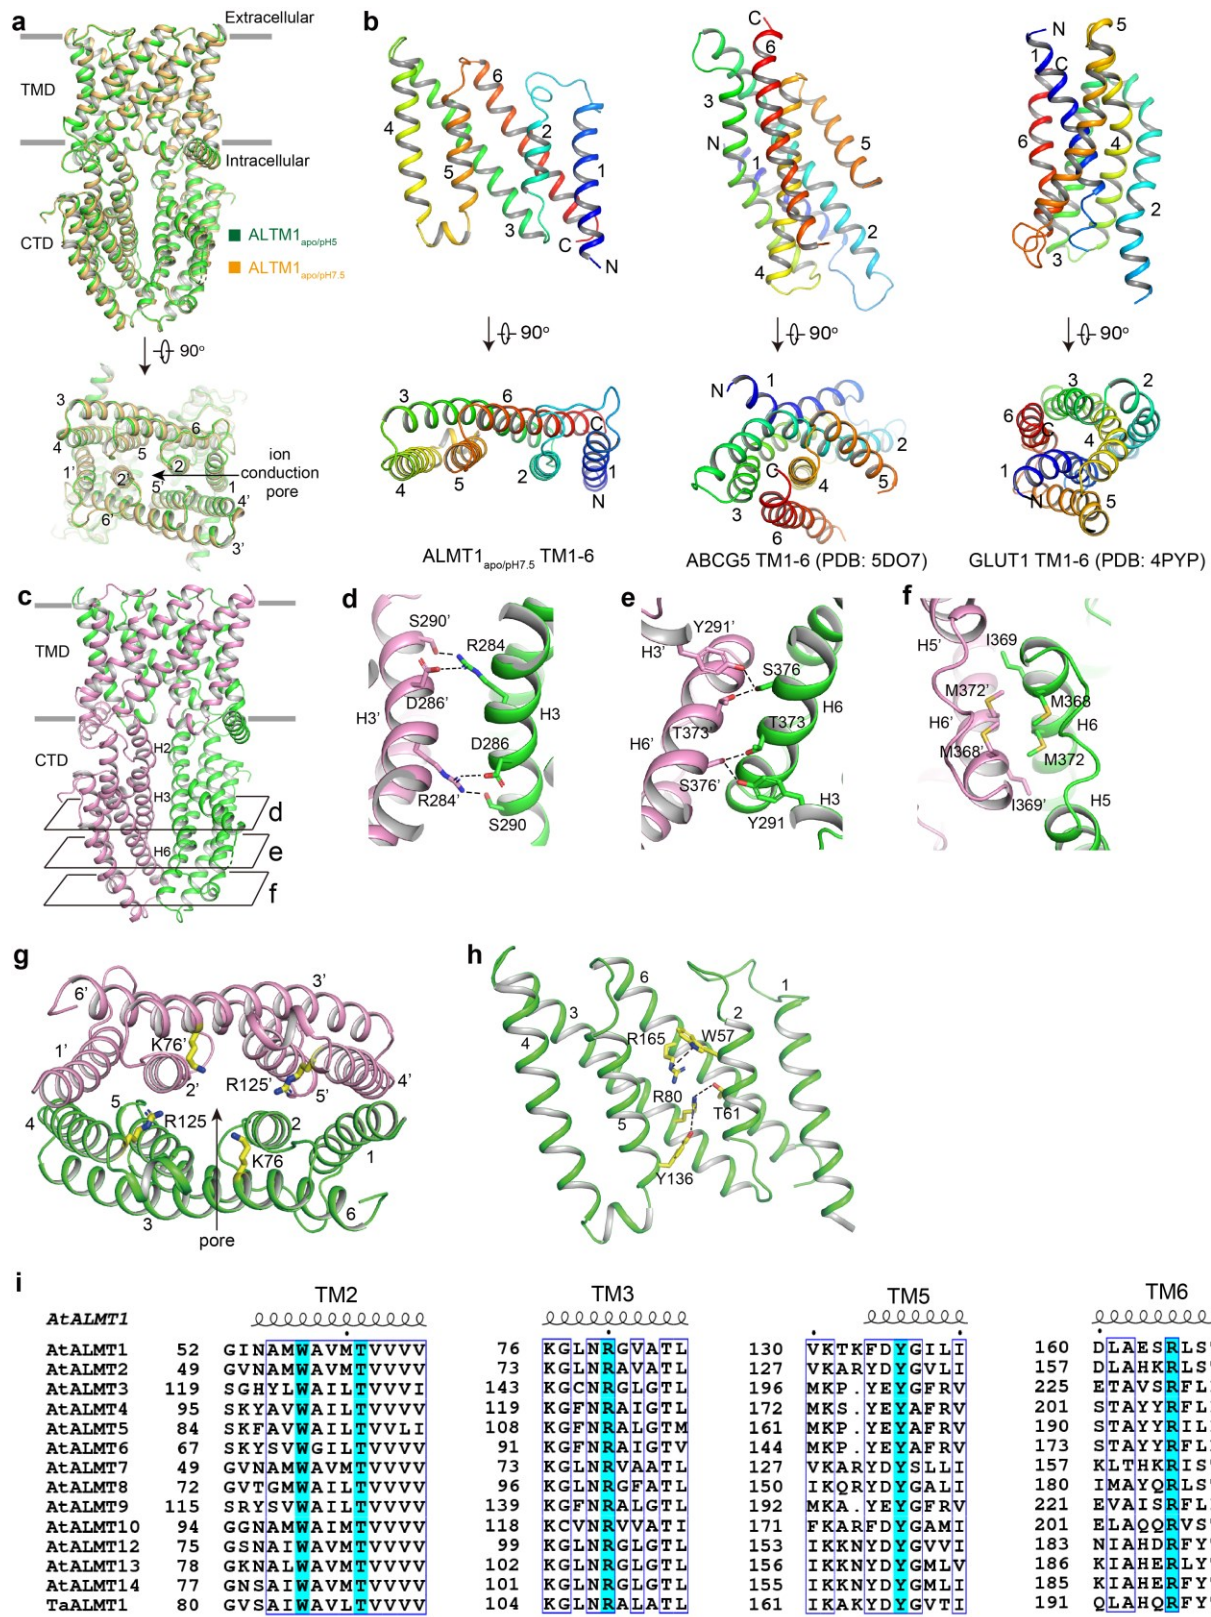

1

2 Fig. S5 Structures of the apo AtALMT1.

1 **a**, Structural alignment of ALMT1<sub>apo/pH5</sub> and ALMT1<sub>apo/pH7.5</sub>. **b**, Side and top views of  
2 ALMT1<sub>apo/pH7.5</sub> (TM1–6), ABCG5 (TM1–6) and GLUT1 (TM1–6). ALMT1 displays different  
3 transmembrane helix arrangements in comparison with ABCG5 and GLUT1. The orientations of  
4 ABCG5 and GLUT1 are set based on their structural alignments with ALMT1<sub>apo/pH7.5</sub>. **c**,  
5 Dimerization of the CTD in ALMT1<sub>apo/pH5</sub>. **d**, Salt bridges and hydrogen bonds between two H3  
6 helices. **e**, Hydrogen bonds stabilize the H3 and H6 helices. **f**, Hydrophobic interactions between  
7 two H6 helices. **g**, Positively charged residues localized at the intracellular entrance of the channel  
8 pore. **h**, Hydrogen bonds and the cation- $\pi$  interaction stabilize the side-chain conformations of  
9 Arg80 and Arg165, respectively. **i**, Sequence alignment of *Arabidopsis thaliana* ALMT family  
10 and TaALMT1. Two highly conserved Arg and their interaction residues shown in **h** are  
11 highlighted with cyan boxes.  
12
