# Supplementary material
Source: PubMed Central journal article supplement (PMC8724285)
Supplement: 41422_2021_587_MOESM7_ESM.pdf [file 41422_2021_587_MOESM7_ESM.pdf]

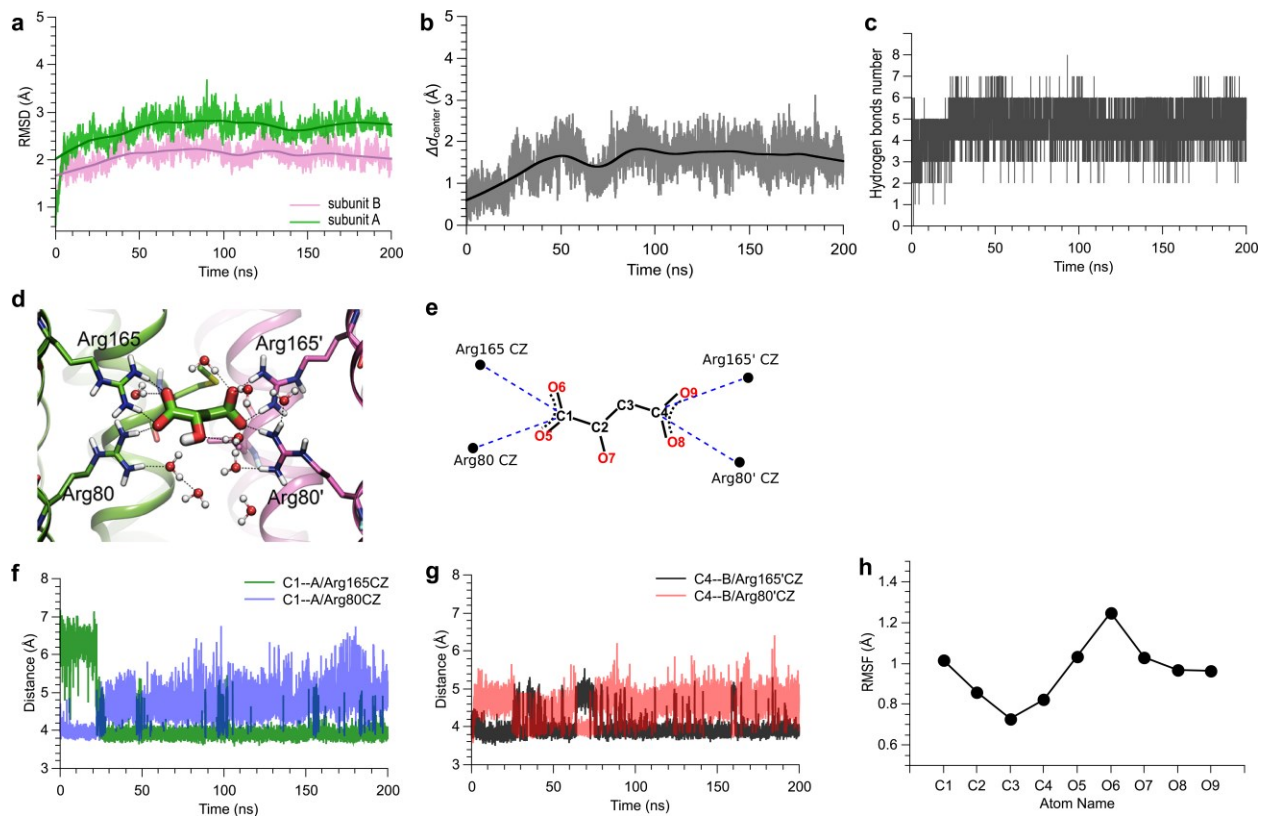

1

2 **Fig. S7 Molecular dynamic simulation of ALMT1<sub>malate</sub>/pH7.5.**

3 **a**, The RMSD of the backbone of the two subunits during the simulation. Both subunits were  
 4 equilibrated after 50 ns, with RMSD values converging at < 3.0 Å. **b**, Deviations of the malate  
 5 mass center from its original coordinate ( $\Delta d_{\text{center}}$ ) during MD simulation. **c**, The hydrogen bond  
 6 numbers between the malate and the four Arg residues. Five hydrogen bonds are formed between  
 7 the malate and Arg80, Arg165 from two subunits. **d**, The representative conformation of the  
 8 biggest cluster of malate. Dashed lines represent hydrogen bonds. **e**, The atom names in the malate  
 9 structure for the simulation. The blue dashed lines are for the measurement of the distance between  
 10 carboxylate carbon atoms (C1/C4) and the zeta carbon (CZ) of the Arg80/Arg165 from each  
 11 subunit. **f**, The distances between malate C1 and CZ of the two Arg residues from subunit A during  
 12 the simulation. **g**, The distances between malate C4 and CZ of the two Arg residues from subunit  
 13 B during the simulation. **h**, The root-mean-square-fluctuation (RMSF) values of the nine atoms of  
 14 the malate for the 200 ns MD simulation.

15
