# Supplementary material
Source: PubMed Central journal article supplement (PMC8724285)
Supplement: 41422_2021_587_MOESM8_ESM.pdf [file 41422_2021_587_MOESM8_ESM.pdf]

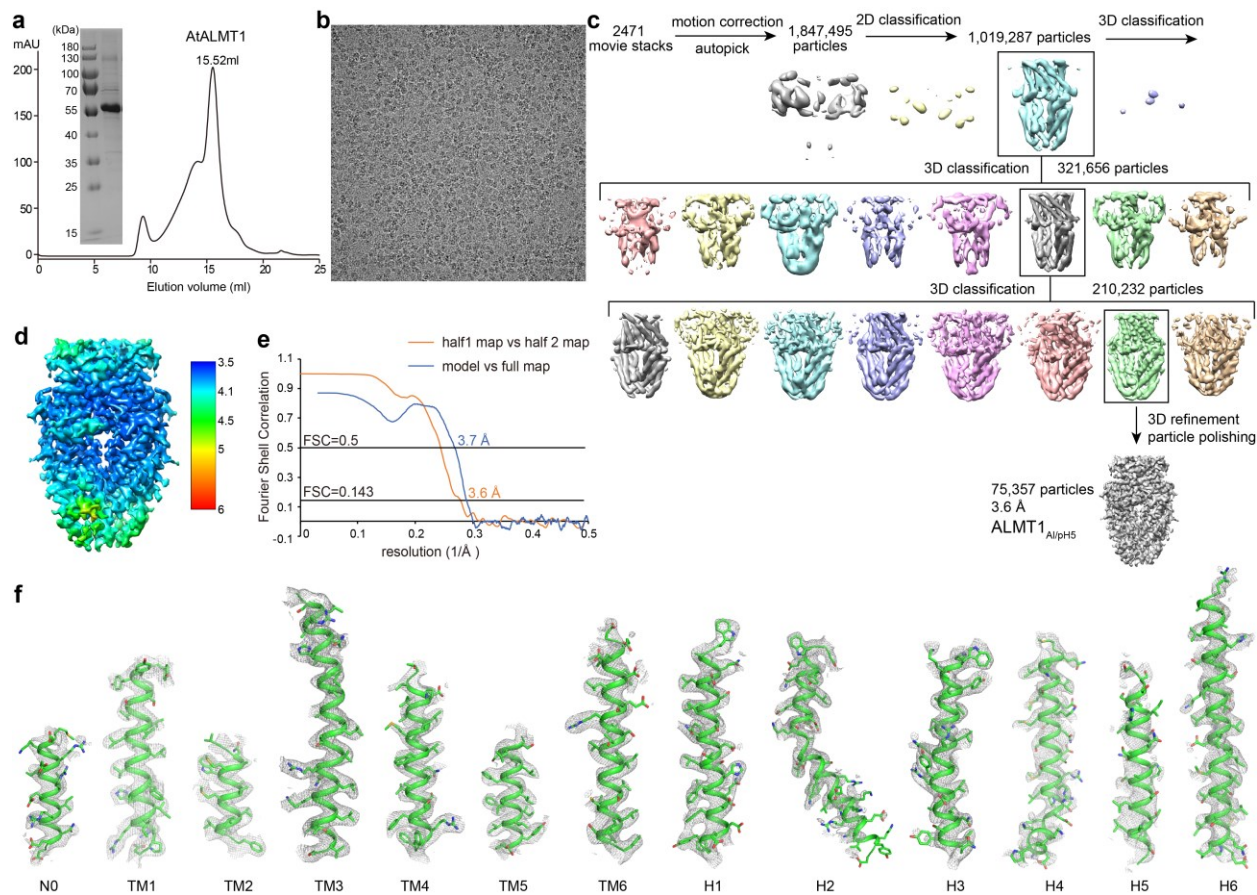

1  
2  
3  
4  
5  
6  
7  
8  
9  
10

**Fig. S8 Structure determination of ALMT1<sub>Al/pH5</sub>.**

**a**, Size-exclusion chromatography of AtALMT1 in 1 mM AlCl<sub>3</sub> at pH 5 on Superose 6 (GE Healthcare), and SDS-PAGE image of the final protein sample. **b**, Representative cryo-EM micrograph of ALMT1<sub>Al/pH5</sub>. **c**, Flowchart of image processing for ALMT1<sub>Al/pH5</sub> particles. **d**, The density map of ALMT1<sub>Al/pH5</sub> colored by local resolution in Å. **e**, The Gold standard Fourier Shell Correlation (FSC) curve of the final 3D reconstruction of ALMT1<sub>Al/pH5</sub>, and the FSC curve for cross-validation between the map and the model of ALMT1<sub>Al/pH5</sub>. **f**, Sample maps at the 13 helices from ALMT1<sub>Al/pH5</sub> at the contour level of 4 σ.
