# Supplementary material
Source: PubMed Central journal article supplement (PMC8724285)
Supplement: 41422_2021_587_MOESM9_ESM.pdf [file 41422_2021_587_MOESM9_ESM.pdf]

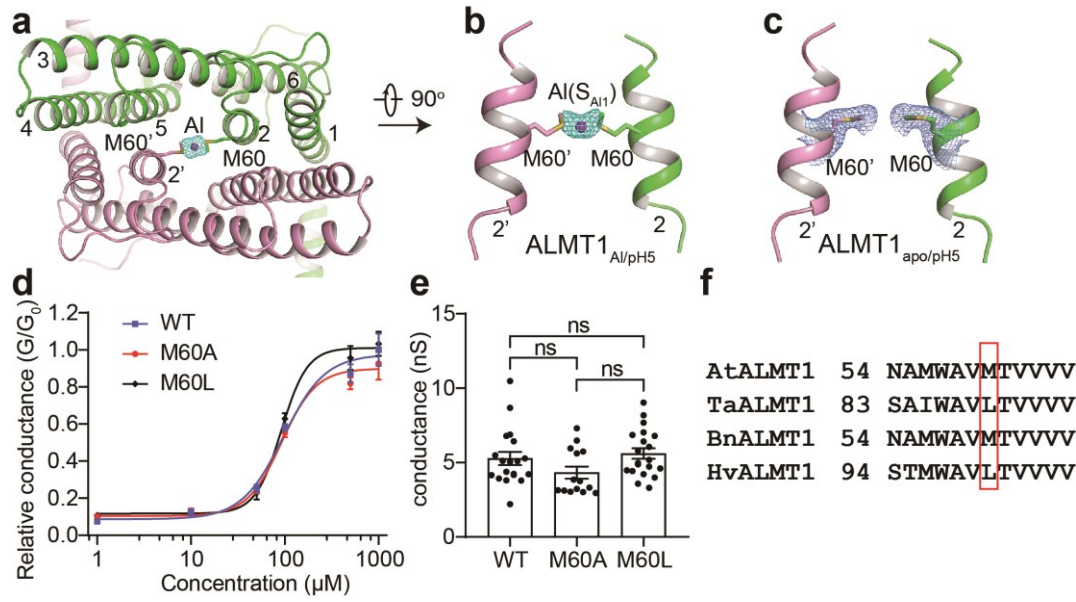

**Fig. S9 The Al binding site S<sub>AlI</sub>.**

**a**, The extracellular view of the S<sub>AlI</sub> site localized in the pore in the ALMT1<sub>Al/pH5</sub> structure. **b**, Al at the S<sub>AlI</sub> site is coordinated by a pair of Met60. The Al density is shown at the contour level of 10  $\sigma$ . The map is sharpened with a B factor of  $-80 \text{ \AA}^2$ . **c**, The S<sub>AlI</sub> site in the map of ALMT1<sub>apo/pH5</sub>. The densities around the S<sub>AlI</sub> site and Met60 are shown at the contour level of 4  $\sigma$ . No density is observed around the S<sub>AlI</sub> site. **d**, Concentration-dependent extracellular Al activation of WT and mutant AtALMT1. Data are reported as means  $\pm$  s.e.m. of at least five independent biological replicates. Curves are least-square fits to a Hill equation with half-maximum activation concentration (EC<sub>50</sub>) values of  $98.17 \pm 3.53$ ,  $97.12 \pm 5.13$ , and  $91.12 \pm 1.24 \text{ \mu M}$  for WT, M60A, and M60L, respectively. **e**, The channel conductance of WT and mutant AtALMT1 measured at -180 mV. The two mutants show no significant (ns) differences in comparison with the WT. Also see Supplementary information, **Fig. S2a, d**. **f**, Sequence alignment of ALMT homologs that are directly activated by Al around Met60 (highlighted by the red box) in AtALMT1.
