# Supplementary material
Source: PubMed Central journal article supplement (PMC8724285)
Supplement: 41422_2021_587_MOESM10_ESM.pdf [file 41422_2021_587_MOESM10_ESM.pdf]

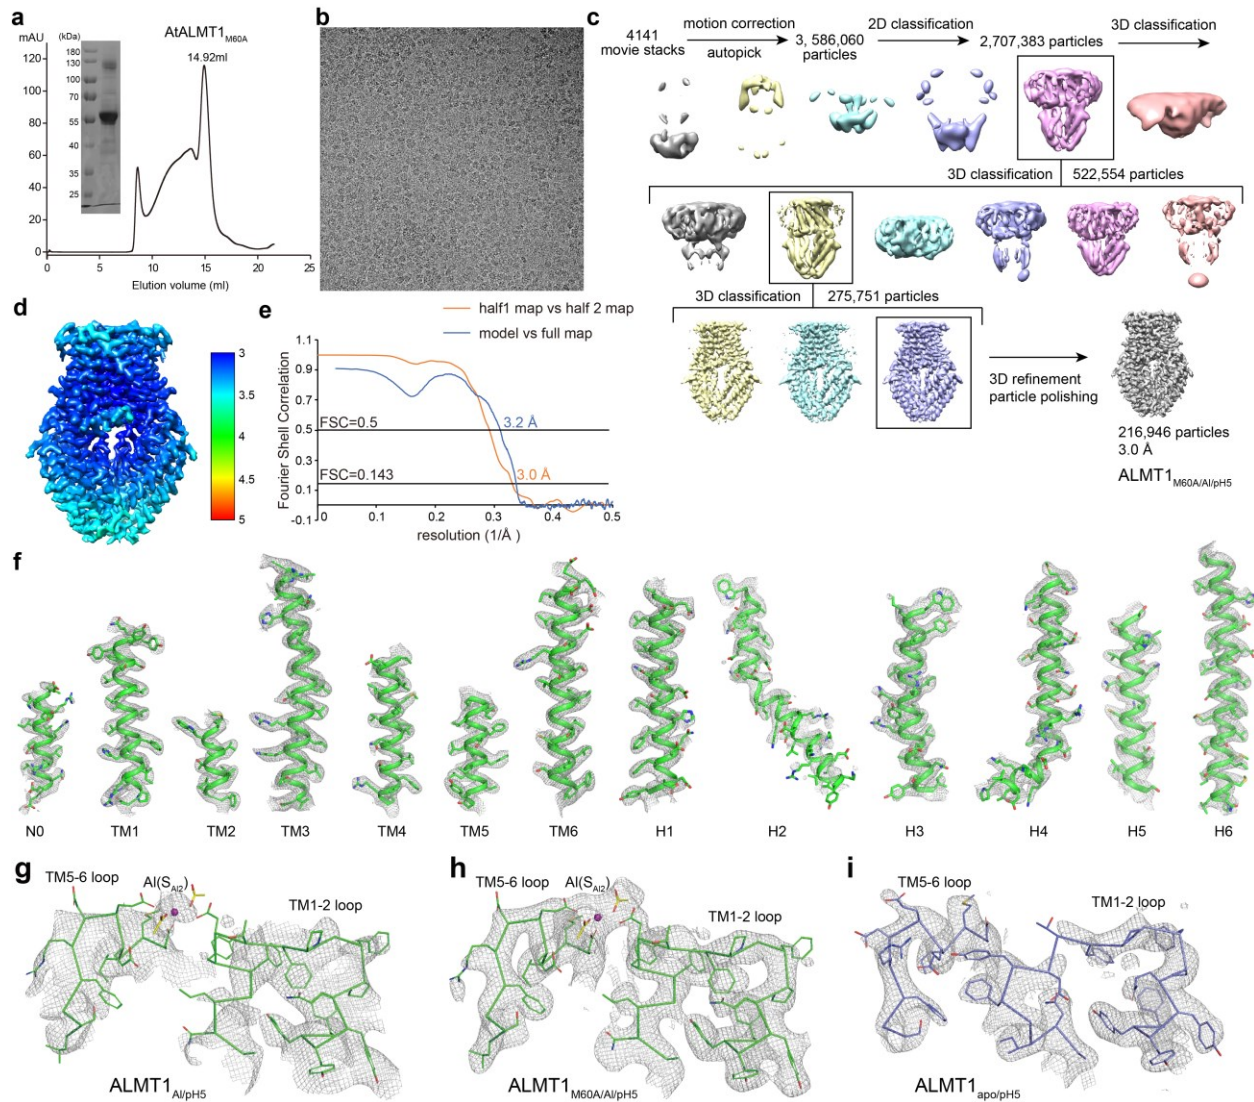

**Fig. S10 Structure determination of ALMT1<sub>M60A/Al/pH5</sub>.**

**a**, Size-exclusion chromatography of AtALMT1 M60A mutant in 1 mM AlCl<sub>3</sub> at pH 5 on Superose 6 (GE Healthcare), and SDS-PAGE image of the final protein sample. **b**, Representative cryo-EM micrograph of ALMT1<sub>M60A/Al/pH5</sub>. **c**, Flowchart of image processing for ALMT1<sub>M60A/Al/pH5</sub> particles. **d**, The density map of ALMT1<sub>M60A/Al/pH5</sub> colored by local resolution in Å. **e**, The Gold standard Fourier Shell Correlation (FSC) curve of the final 3D reconstruction of ALMT1<sub>M60A/Al/pH5</sub>, and the FSC curve for cross-validation between the map and the model of ALMT1<sub>M60A/Al/pH5</sub>. **f**, Sample maps at the 13 helices from ALMT1<sub>M60A/Al/pH5</sub> at the contour level of 4  $\sigma$ . **g**, EM maps of ALMT1<sub>Al/pH5</sub> at the TM1–2 loop and TM5–6 loop regions at the contour level of 4  $\sigma$ . The ribbon model is from the ALMT1<sub>M60A/Al/pH5</sub> structure. **h**, EM maps of ALMT1<sub>M60A/Al/pH5</sub> at the TM1–2 loop and TM5–6 loop regions at the contour level of 4  $\sigma$ . The ribbon model is from the

- 1 ALMT1<sub>M60A/AI/pH5</sub> structure. **i**, EM maps of ALMT1<sub>apo/pH5</sub> at the TM1–2 loop and TM5–6 loop
- 2 regions at the contour level of  $4\sigma$ . The ribbon model is from the ALMT1<sub>apo/pH5</sub> structure.
- 3
